# Supplementary figures and images for: Persulfate oxidation enhanced extraction to improve the removal of high concentration phenol wastewater
Source: Royal Society of Chemistry journal article supplement (doi:10.1039/d1ew00683e), 2022-01-01

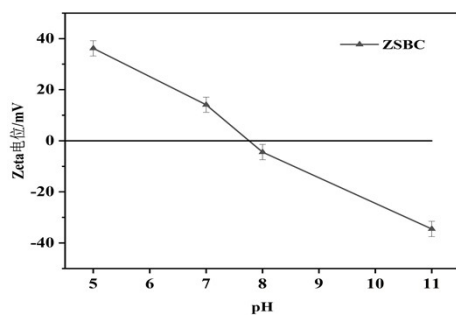

Fig. S1. Zeta potential of ZSBC.

Supplement: d1ew00683e1.pdf [file d1ew00683e1.pdf]
